# Supplementary material for: Methanation of CO2 over High Surface Nickel/Aluminates Compounds Prepared by a Self-Generated Carbon Template
Source: MDPI journal article supplement (doi:10.3390/catal13010142), 2023-01-07
Supplement: s1 [file s1]

Archive with 1 entries (1 files):
- catalysts-2060374-supplementary.pdf
