# Supplementary material for: Methanation of CO2 over High Surface Nickel/Aluminates Compounds Prepared by a Self-Generated Carbon Template
Source: MDPI journal article supplement (doi:10.3390/catal13010142), 2023-01-07
Supplement: s1 [file s1 › catalysts-2060374-supplementary.pdf]

## Supplementary data

**Table S1.** Calculated surface % area for the indicated elements obtained from XPS and peaks maxima for NiBaAlO, NiMgAlO and NiCaAlO samples

| Percentage of indicated species for deconvolution of C1s and Ni2p XPS signals |                        |                        |                      |                                |                                |
|-------------------------------------------------------------------------------|------------------------|------------------------|----------------------|--------------------------------|--------------------------------|
| XPS Zone<br>Sample                                                            | C1s-1 %<br>(Carbonate) | C1s-2 %<br>(Graphitic) | C1s-3 %<br>(Carbide) | Ni2p-1%<br>(Ni <sup>2+</sup> ) | Ni2p-2 %<br>(Ni <sup>0</sup> ) |
| NiBaAlO                                                                       | 25.3                   | 69                     | 5.7                  | 90.0                           | 10.0                           |
| NiBaAlO-PRx                                                                   | 45.9                   | 38.6                   | 15.5                 | 62.7                           | 37.3                           |
| NiCaAlO                                                                       | 10.7                   | 84.6                   | 4.8                  | 98.7                           | 1.3                            |
| NiCaAlO-PRx                                                                   | 22.8                   | 50.3                   | 26.9                 | 50.6                           | 49.4                           |
| NiMgAlO                                                                       | 15.3                   | 77                     | 7.6                  | 100.0                          | 0.0                            |
| NiMgAlO-PRx                                                                   | 3.3                    | 48.1                   | 48.6                 | 69.5                           | 30.5                           |

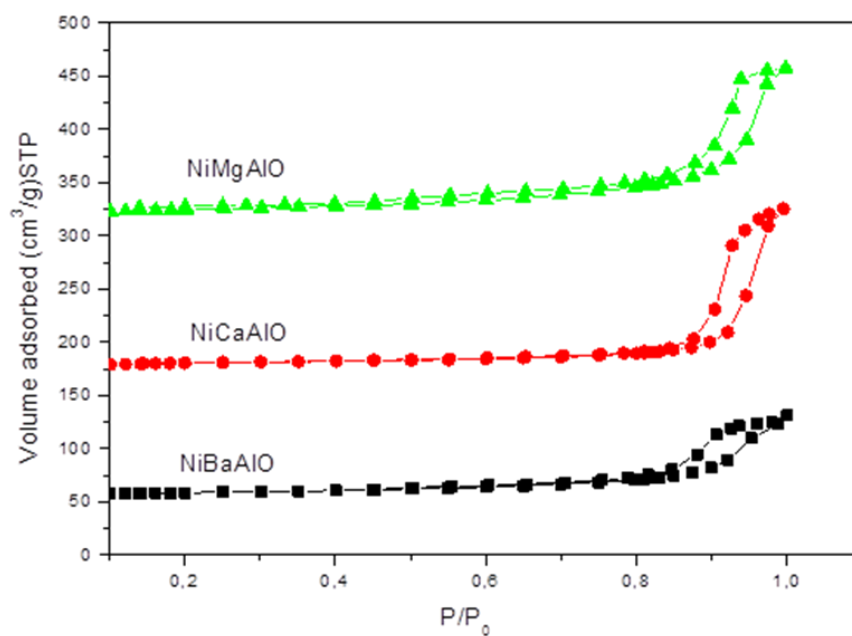

**Fig. S1.** Nitrogen adsorption–desorption isotherms of catalysts

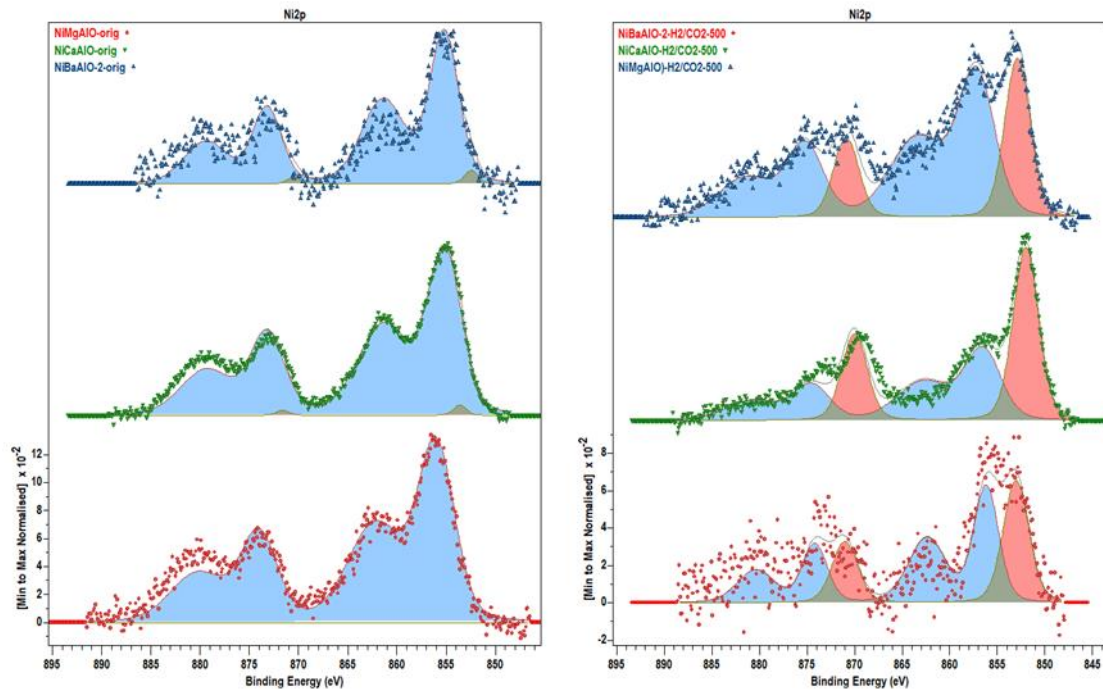

**Fig. S2.** Fitting of Ni2p XPS of orinal samples (left) and “in situ” treated samples after CO<sub>2</sub>+H<sub>2</sub> reaction (right). Light blue component simulate NiO (Ni<sup>2+</sup>) and pink component simulate metallic nickel (Ni<sup>0</sup>)

**Table S2.** List of peak position and corresponding crystallographic planes for XRD patterns graphed on Figure 1 and Figure 7

Peaks located at 37.442°, 43.473°, 63.204°, 75.374° and 79.870° can be assigned to the (111), (200), (220), (311) and (222) planes of cubic phased and space group of Fm-3m respectively for NiO species (JCPDS, No. 00-001-1239). The XRD spectrum of the catalyst NiMgAlO also indicates the presence of the phase spinel of MgAl<sub>2</sub>O<sub>4</sub>, which is situated at 19.154°, 31.589°, 37.281°, 45.306°, 60.026°, 66.229°, 74.679°, and 78.306°, and may be ascribed to the (111), (220), (311), (400), (511), (620), and (622) planes of (JCPDS, No.00-001-157).

Peaks at 35.213°, 37.487°, 41.751°, 46.265°, 52.651°, 57.609°, 61.418°, 66.651°, 68.348° and 77.029°, which may be ascribed to the (112), (-110), (222), (020), (220), (020), (132), (-121), (130), (-211) and (343) planes of phased Rhombohedral and space group of R-3c (JCPDS, No.01-073-1512) and the BaAl<sub>2</sub>O<sub>4</sub> side-phase .

Peaks located at 19.985°, 25.428°, 28.967°, 33.002°, 34.481°, 35.465°, 36.868°, 40.568°, 41.365°, 44.052°, 45.116°, 46.840°, 47.942°, 52.230°, 54.653°, 57.129°, 61.166°, 66.495°, 68.8311°, can be assigned of Monoclinic phase and space group: C2/c (JCPDS, NO.00-023-1037).

Peaks located at 44.497°, 51.851°, 76.383 correspond to (111), (200), and (220) planes of metallic Ni (JCPDS, No. 01-087-0712).
